1 **Evidence of polygenic adaptation at height-associated loci in mainland Europeans and**  
2 **Sardinians**

3 Minhui Chen<sup>1</sup>, Carlo Sidore<sup>2</sup>, Masato Akiyama<sup>3,4</sup>, Kazuyoshi Ishigaki<sup>3</sup>, Yoichiro Kamatani<sup>3,5</sup>, David  
4 Schlessinger<sup>6</sup>, Francesco Cucca<sup>2</sup>, Yukinori Okada<sup>3,7</sup>, Charleston W. K. Chiang<sup>1,8</sup>

5

6 <sup>1</sup>Center for Genetic Epidemiology, Department of Preventive Medicine, Keck School of Medicine,  
7 University of Southern California, Los Angeles, CA, USA.

8 <sup>2</sup>Istituto di Ricerca Genetica e Biomedica, Consiglio Nazionale delle Ricerche, Monserrato, Cagliari, Italy.

9 <sup>3</sup>Laboratory for Statistical Analysis, RIKEN Center for Integrative Medical Sciences, Yokohama, Japan.

10 <sup>4</sup>Department of Ocular Pathology and Imaging Science, Graduate School of Medical Sciences, Kyushu  
11 University, Fukuoka, Japan.

12 <sup>5</sup>Kyoto-McGill International Collaborative School in Genomic Medicine, Kyoto University Graduate  
13 School of Medicine, Kyoto, Japan.

14 <sup>6</sup>Laboratory of Genetics and Genomics, National Institute on Aging, US National Institutes of Health,  
15 Baltimore, MD, USA

16 <sup>7</sup>Department of Statistical Genetics, Osaka University Graduate School of Medicine, Osaka Japan.

17 <sup>8</sup>Quantitative and Computational Biology Section, Department of Biological Sciences, University of  
18 Southern California, Los Angeles, CA, USA.

19

20 Correspondence: m.c. [minhuic@usc.edu](mailto:minhuic@usc.edu), c.w.k.c. [charleston.chiang@med.usc.edu](mailto:charleston.chiang@med.usc.edu)

21

22

23

24

25

26

27

28

29

30

31

## 32 Abstract

33 Adult height was one of the earliest putative examples of polygenic adaptation in human. By  
34 constructing polygenic height scores using effect sizes and frequencies from hundreds of genomic loci  
35 robustly associated with height, it was reported that Northern Europeans were genetically taller than  
36 Southern Europeans beyond neutral expectation. However, this inference was recently challenged.  
37 Sohail et al. and Berg et al. showed that the polygenic signature disappeared if summary statistics from  
38 UK Biobank (UKB) were used in the analysis, suggesting that residual uncorrected stratification from  
39 large-scale consortium studies was responsible for the previously noted genetic difference. It thus  
40 remains an open question whether height loci exhibit signals of polygenic adaptation in any human  
41 population. In the present study, we re-examined this question, focusing on one of the shortest  
42 European populations, the Sardinians, as well as on the mainland European populations in general. We  
43 found that summary statistics from UKB significantly correlate with population structure in Europe. To  
44 further alleviate concerns of biased ascertainment of GWAS loci, we examined height-associated loci  
45 from the Biobank of Japan (BBJ). Applying frequency-based inference over these height-associated loci,  
46 we showed that the Sardinians remain significantly shorter than expected ( $\sim 0.35$  standard deviation  
47 shorter than CEU based on polygenic height scores,  $P = 1.95e-6$ ). We also found the trajectory of  
48 polygenic height scores decreased over at least the last 10,000 years when compared to the British  
49 population ( $P = 0.0123$ ), consistent with a signature of polygenic adaptation at height-associated loci.  
50 Although the same approach showed a much subtler signature in mainland European populations, we  
51 found a clear and robust adaptive signature in UK population using a haplotype-based statistic, tSDS,  
52 driven by the height-increasing alleles ( $P = 4.8e-4$ ). In summary, by examining frequencies at height loci  
53 ascertained in a distant East Asian population, we further supported the evidence of polygenic  
54 adaptation at height-associated loci among the Sardinians. In mainland Europeans, we also found an  
55 adaptive signature, although becoming more pronounced only in haplotype-based analysis.

## 56 Introduction

57 Because of the highly polygenic nature of many human complex traits, polygenic adaptation was  
58 thought to be one of the important mechanisms of phenotypic evolution in humans. Since each genetic  
59 locus contributes a small effect to complex traits, polygenic adaptation is expected to be different from  
60 the classic selective sweep, where a beneficial allele is driven to near-fixation in a population due to  
61 strong positive selection. In polygenic adaptation, only a subtle but coordinated allele frequency shift  
62 across loci underlying the selected trait is expected. In humans, height is one of the earliest putative  
63 examples of polygenic adaptation. (We note that adaptation, if present, could be due to a trait for which  
64 height is a proxy; it is the height-associated loci that exhibited signals of adaptation, and thus we are  
65 investigating if selection had been contributing to the height differences between populations, rather  
66 than whether height itself is under selection.) Northern Europeans are known to be taller than Southern  
67 Europeans on average (Bentham et al., 2016; Grasgruber, Cacek, Kalina, & Sebera, 2014). By evaluating  
68 the changes of allele frequencies at height-associated loci, either weighted or unweighted by the effect  
69 sizes on height, multiple studies have suggested polygenic adaptation in human height in European and  
70 other populations (Berg & Coop, 2014; Field et al., 2016; Guo et al., 2018; Robinson et al., 2015; Tucci et  
71 al., 2018; Turchin et al., 2012; Zoledziewska et al., 2015)

72 However, the adaptive signature at height-associated loci was recently called into question by two  
73 papers (Berg et al., 2019; Sohail et al., 2019). The authors of both papers found that the adaptive  
74 signature disappeared if GWAS summary statistics from UK Biobank (UKB) were used in the analysis.  
75 This suggested that previous studies of adaptation might have been misled due to the ascertainment of  
76 a set of height-associated loci with biased estimates of effect sizes; the aggregation of which across large  
77 number of height-associated loci led to the apparent difference in genetic height between Northern and  
78 Southern Europeans. It was suggested that the biased effect sizes were due to residual uncorrected  
79 stratification from large-scale consortium studies of human height such as the GIANT (Genetic  
80 Investigation of ANthropometric Traits) consortium (Wood et al., 2014), where the control for  
81 population stratification occurred at the level of smaller individual studies were insufficient. In contrast,  
82 large-scale biobank level studies where individual data were available permitted much more effective  
83 control for stratification either through principal component analysis or linear mixed models (Berg et al.,  
84 2019; Sohail et al., 2019).

85 While these studies and others (Kerminen et al., 2019) investigated the degree to which over-estimated  
86 effect sizes in GWAS led to unrealistic polygenic height scores and differences between populations, it  
87 remains an open question of whether height-associated loci exhibit signals of polygenic adaptation, in  
88 any human populations. For one, the original report of polygenic adaptation on height in Europe relied  
89 solely on frequency changes between populations and the direction of association among alleles most  
90 associated with height (Turchin et al., 2012). By not taking into account the effect sizes this approach  
91 should be more robust to uncorrected stratification in GWAS. Moreover, loci most strongly associated  
92 with height appear to still exhibit a strong signal in haplotype-based singleton density score (SDS)  
93 analysis (Sohail et al. 2018). Furthermore, estimated temporal trajectory of polygenic height scores also  
94 showed a small but significant uptick in the recent history (Edge and Coop 2019). Finally, pygmies from  
95 the Indonesian island Flores exhibited lower genetic height than expected, based on height loci  
96 ascertained in the distantly related UKB population (Tucci et al., 2018).

97 In the present study, we re-examined if height-associated loci exhibit signs of adaptation in Europe. We  
98 characterized the behavior of polygenic adaptation analysis and how the conclusions and interpretations  
99 are impacted by different ascertainment schemes in the analysis. Moreover, in light of reported  
100 stratification (Haworth et al., 2019) and polygenic selection for height (Liu et al., 2018) in the UKB  
101 population, and our finding here that height-associated loci ascertained from UKB are still significantly  
102 associated with structure in Europe, we chose to conduct our analysis using height-associated SNPs  
103 ascertained from the Biobank of Japan (BBJ). Because it is a population distant from Europe, we  
104 reasoned and demonstrated that height-associated loci ascertained in this panel were not associated  
105 with the structure in Europe. As such, in absence of a very large scaled family-based analysis to ascertain  
106 height-associated loci, our analytical framework represents the least likely to be impacted by any cryptic  
107 covariances due to population stratification. Under this framework, we found that the Sardinians, one of  
108 the shortest populations in Europe, have significantly lower polygenic height scores than expected given  
109 their genetic relatedness to other European populations, consistent with previous reports (Zoledziewska  
110 et al., 2015). In mainland Europe, however, the adaptive signature based on allele frequencies was much  
111 subtler, though we observed a strong haplotype-based signature using tSDS (trait-SDS). Together,  
112 findings of our study provide additional evidence of polygenic adaptation at height-associated loci in at  
113 least some European populations.

114

## 115 Materials and methods

### 116 GWAS panels

117 To calculate polygenic height score, we obtained GWAS summary statistics from three studies.

- 118 • GIANT (Wood et al., 2014): a meta-analysis of 79 separate GWAS for height involved a total of  
119 ~253 K individuals of European ancestry with ~2.5 M variants, with each study independently  
120 controlling for population structure via the inclusion of principal components as covariates.
- 121 • UKB: a GWAS on UKB with ~360 K individuals, imputed to whole-genome sequencing data from  
122 Haplotype Reference Consortium (HRC), UK10K, and 1000 Genomes for ~13.8 M variants,  
123 corrected for 20 principal components ([https://storage.googleapis.com/ukbb-  
124 robert/height\\_ukb\\_giant/robert1/50.imputed\\_v3.results.both\\_sexes.tsv.gz](https://storage.googleapis.com/ukbb-robert/height_ukb_giant/robert1/50.imputed_v3.results.both_sexes.tsv.gz) downloaded in  
125 October 2018).
- 126 • BBJ (Akiyama et al., in press): ~159 K individuals of Japanese ancestry from Biobank of Japan  
127 (Hirata et al., 2017; Nagai et al., 2017), imputed to combined whole-genome sequencing data  
128 from BBJ and 1000 Genomes for 27.2 M variants. Individuals not of Japanese origins were  
129 excluded by self-report or principal component analysis (PCA). GWAS was conducted using  
130 linear mixed model implemented in BOLT-LMM (P.-R. Loh et al., 2015).

131

### 132 Population genetic data

133 We separately evaluated polygenic selection on height-associated loci in mainland Europeans and in  
134 Sardinians. For mainland Europeans, we analyzed two populations from Northern Europe, *i.e.* GBR  
135 (British in England and Scotland) and CEU (Utah Residents with Northern and Western European  
136 Ancestry), and two populations from Southern Europe, *i.e.* IBS (Iberian Population in Spain) and TSI  
137 (Toscani in Italia) using data from 1000 Genomes phase three release (1000 Genomes Project  
138 Consortium et al., 2015). We did not include the FIN (Finnish in Finland) population because of its known  
139 unique demographic history (Locke et al., 2019), and for achieving better balance of sample sizes  
140 between the two comparison populations. For Sardinians, we further included frequency estimates from  
141 615 Sardinian individuals whole-genome sequenced in the SardiNIA study (Chiang et al., 2018) along  
142 with the four mainland European populations.

143

### 144 Population structure analysis

145 To measure the impact of uncorrected stratification on estimated effect sizes for a set of ascertained  
146 height-associated variants, we computed the correlation between principal component (PC) loadings  
147 and beta effects estimated from GWAS. We first conducted PCA on the four mainland European  
148 populations (CEU, GBR, IBS, and TSI) from 1000 Genomes. We used variants that were present in all  
149 three GWAS panels, and that had minor allele frequency (MAF) > 5% in the four European populations.  
150 We pruned SNPs with  $r^2 < 0.2$  with the option of ‘--indep-pairwise 50 5 0.2’ using PLINK version 1.9  
151 ([www.cog-genomics.org/plink/1.9/](http://www.cog-genomics.org/plink/1.9/)) (Chang et al., 2015) to remove correlated variants, and removed  
152 SNPs in regions of long-range LD (Price et al., 2008). PCA was performed on the remaining variants using  
153 Eigensoft version 7.2.1 (<https://github.com/DReichLab/EIG/archive/v7.2.1.tar.gz>). We performed linear  
154 regressions of the PC scores on the allelic genotype count for each variant and used the resulting

155 regression coefficients as the variant's PC loading estimates. We then computed Pearson correlation  
156 coefficients of PC loadings and beta effects from each GWAS panel (GIANT, UKB, and BBJ) for each  
157 principal component, and estimated  $P$  values based on Jackknife standard errors by splitting the genome  
158 into 1,000 blocks with an equal number of variants.

159

### 160 Population-level polygenic height score calculation

161 To compute polygenic scores, we ascertained independent GWAS variants associated with height by  
162 selecting a set of genome-wide significant variants ( $p < 5e-8$ ) with MAF > 1% after greedily pruning any  
163 other variants such that no two variants were within 500 kb of each other. For simplicity, we refer to  
164 these sets of variants as independent, although they are only quasi-independent as linkage  
165 disequilibrium (LD) information was not taken into account. In order to compare to previous reports  
166 (Berg et al., 2019; Sohail et al., 2019), we additionally ascertained height-associated SNPs by dividing the  
167 genome into approximately independent LD blocks computed in (Berisa & Pickrell, 2016) (for GIANT and  
168 UKB panels, using the ~1,700 blocks in the EUR population; for BBJ panel, using the ~1,400 blocks in the  
169 ASN populations), and the variant with the lowest  $P$  value, regardless of whether the variant reached  
170 genome-wide significance level, within each block was ascertained to give a set of ~1,700 or 1,400  
171 independent variants for each height GWAS panel.

172 Given a set of height-associated SNPs, the estimated effect sizes from each GWAS panel were then used  
173 to compute polygenic height scores for each population by

$$174 \quad Z = \sum_l^L 2\beta_l p_l$$

175 Where  $p_l$  and  $\beta_l$  were the allele frequency and effect size at SNP  $l$ . We would also compute the per-SNP  
176 contribution to differences between populations 1 and 2 as  $(Z_2 - Z_1)/L$ .

177

### 178 Evaluation of selection on height-associated loci

179 To evaluate the evidence of selection on height-associated loci, we applied the following three methods:

#### 180 Excess variance test

181 We conducted the  $Q_x$  test (Berg & Coop, 2014) to determine whether the estimated polygenic scores  
182 exhibited excess variance among populations than null expectation under genetic drift:

$$183 \quad Q_x = \frac{\vec{Z}'^T F^{-1} \vec{Z}'}{2V_A}$$

184 Where  $\vec{Z}$  was a vector of estimated genetic values (*i.e.* a sum of sample allele frequencies weighted by  
185 effect size) for testing populations,  $F$  was a matrix describing the correlation structure of allele  
186 frequencies across populations,  $V_A$  was the additive genetic variance of the ancestral (global) population.  
187 The  $F$  matrix was constructed by sampling 20,000 variants from GWAS panels matching by MAF,  
188 recombination rate, and background selection measured by  $B$  values from (McVicker, Gordon, Davis, &  
189 Green, 2009). Specifically, we partitioned variants into a three-way contingency table in each GWAS

190 panel, with 25 bins for MAF (i.e. a bin size of 0.02, matched by ancestry), 100 bins for recombination  
191 rate, and 10 bins for B value. For recombination rate, we used CEU, GBR, and JPT (Japanese in Tokyo,  
192 Japan) genetic maps generated from the 1000 Genome phased OMNI data  
193 ([http://ftp.1000genomes.ebi.ac.uk/vol1/ftp/technical/working/20130507\\_omni\\_recombination\\_rates/](http://ftp.1000genomes.ebi.ac.uk/vol1/ftp/technical/working/20130507_omni_recombination_rates/)  
194 downloaded in November 2018) for GWAS panels GIANT, UKB, and BBJ, respectively. The statistic should  
195 follow a  $\chi^2$  distribution with  $M-1$  degrees of freedom under neutrality, where  $M$  was the number of test  
196 populations, from which an asymptotic  $p$  value was estimated. Significant excess of variance among  
197 populations would be consistent with the differential action of natural selection among populations.

198 To identify outlier populations which contributed to the excess of variance, we further estimated the  
199 conditional Z-score proposed by (Berg & Coop, 2014). Specifically, we excluded one population at a time,  
200 and then calculated the expected mean and variance of genetic value in the excluded population given  
201 the values observed in the remaining populations, and the covariance matrix relating them. Using this  
202 conditional mean and variance, we calculated a Z-score to describe the fit of the estimated genetic value  
203 of the excluded population by the drift model conditioned on the values in the remaining populations.  
204 An extreme Z-score for a particular population suggested that the excluded population had experienced  
205 directional selection on the trait of interest that was not experienced by the related populations on  
206 which we conditioned the analysis.

207 In practice, we also generated the empirical null distributions of  $Q_x$  statistic and conditional Z-scores by  
208 calculating 10,000 null genetic values using resampled SNPs genome-wide matching by MAF,  
209 recombination rate, and B value in the same way for the construction of  $F$  matrix. The empirical  $p$  values  
210 for conditional Z-scores tended to match well with the asymptotic  $p$  values (data not shown). Therefore,  
211 throughout the study, we used the asymptotic  $p$  value for the  $Q_x$  statistic and conditional Z-score. The  
212 scripts we used to implement these analyses are available at  
213 <https://github.com/jjberg2/PolygenicAdaptationCode> (downloaded in October 2018).

214

#### 215 Polygenic height score trajectory

216 Based on the framework of (Edge & Coop, 2019), we constructed the history of polygenic height scores  
217 in the GBR and Sardinian populations. We extracted out 91 individuals each from GBR and Sardinia  
218 (Chiang et al., 2018), then used the software RELATE v1.0.8 (Speidel, Forest, Shi, & Myers, 2019) to  
219 reconstruct ancestral recombination graphs in these two populations together. We only included bi-  
220 allelic SNPs that are found in the genomic mask provided with the 1000 Genome Project dataset  
221 (downloaded from  
222 [ftp://ftp.1000genomes.ebi.ac.uk/vol1/ftp/release/20130502/supporting/accessible\\_genome\\_masks/](ftp://ftp.1000genomes.ebi.ac.uk/vol1/ftp/release/20130502/supporting/accessible_genome_masks/) in  
223 March 2019). We used an estimate of the human ancestral genome (downloaded from  
224 [ftp://ftp.1000genomes.ebi.ac.uk/vol1/ftp/phase1/analysis\\_results/supporting/ancestral\\_alignments/](ftp://ftp.1000genomes.ebi.ac.uk/vol1/ftp/phase1/analysis_results/supporting/ancestral_alignments/) in  
225 March 2019) to identify the most likely ancestral allele for each SNP. We initially estimated branch  
226 lengths using a constant effective population size of 11,314 and a mutation rate of  $1.25e-8$  per base per  
227 generation. We then calculated mutation rate and coalescent rate through time given the branch  
228 lengths using default parameters (30 bins between 1,000 and 10,000,000 years before present, and 28  
229 years per generation). By averaging coalescence rates over all pairs of haplotypes and taking the inverse,  
230 we obtained a population-wide estimate of effective population size. We then used this population size  
231 estimate to re-estimate branch lengths. We iterated these two steps five times to convergence, as



232 suggested by (Speidel et al., 2019), then obtained a final estimate of branch lengths and the effective  
233 population size. Based on the output ancestral recombination graphs we estimated the time courses of  
234 polygenic height scores as estimated sum of allele frequencies weighted by effect sizes for GBR and  
235 Sardinia separately, using the three estimators proposed in (Edge & Coop, 2019): (1) the proportion-of-  
236 lineages estimator estimated allele frequency at a specified time in the past as the proportion of  
237 lineages that carry the allele of interest; (2) Waiting-time estimator and (3) lineages-remaining estimator  
238 estimated allele frequency as the relative sizes of the two subpopulations carrying ancestral and derived  
239 alleles. The former used waiting times between coalescent events to estimate subpopulation sizes, while  
240 the latter used the number of coalescence events that occur between specified time points. The same  
241 set of SNPs (genome-wide significantly associated variants in BBJ, after pruning by distance) was used to  
242 compute the polygenic height score in both GBR and Sardinia. We focused on the proportion-of-lineages  
243 estimators as it had been shown to be the most powerful at detecting selection, due to its improved  
244 precision (Edge & Coop, 2019), but all three estimators were provided for completeness.

245 We tested for significant differences in polygenic height score trajectory between GBR and Sardinia over  
246 time by performing 10,000 permutations of the signs of effect sizes across these SNPs. We specifically  
247 tested if polygenic height score in Sardinia is changing relative to GBR for two time intervals: between  
248 20,000 years and 5,000 years before present, and between 5,000 years ago and the present time. These  
249 time points were chosen because they are approximately the time point for first evidence of human  
250 inhabitation on Sardinia (Calò, Melis, Vona, & Piras, 2008; Vona, 1997) and the onset of Neolithic period  
251 around which time Sardinia diverged from mainland Europeans (Chiang et al., 2018). To estimate  
252 courses of polygenic height scores and conduct significance test, we adopted code from (Edge & Coop,  
253 2019) available at [http://github.com/mdedge/rhps\\_coalescent](http://github.com/mdedge/rhps_coalescent) (downloaded in April 2019).

254

#### 255 tSDS analysis

256 We tested whether height-associated loci are under recent selection in a mainland European population  
257 by examining the distribution of tSDS. Recent selection results in shorter tip branches for the favored  
258 allele. The Singleton Density Score (SDS) (Field et al., 2016) leveraged the average distance between the  
259 nearest singletons on either side of a test SNP across all individuals to estimate the mean tip-branch  
260 length of the derived and ancestral alleles and used this measure to infer evidence of selection. The sign  
261 of SDS can be polarized such that positive scores indicate increased frequency of the trait-increasing (or  
262 trait-decreasing allele) instead of derived allele. The metrics is referred to as trait-SDS (tSDS). We  
263 obtained pre-computed SDS for 4,451,435 autosomal SNPs from 3,195 individuals from the UK10K  
264 project (downloaded from <http://web.stanford.edu/group/pritchardlab/UK10K-SDS-values.zip> in  
265 February 2019). In each GWAS panel (UKB and BBJ), we included only SNPs with a reported SDS prior to  
266 distance pruning to obtain a set of genome-wide significant SNPs. We then calculated the tSDS value for  
267 each variant by polarizing SDS to height-increasing alleles. Therefore, a positive tSDS indicates that a  
268 height-increasing allele has risen in frequency in the recent past; a negative tSDS indicates a height-  
269 increasing allele has dropped in frequency in the recent past. To estimate if an observed mean tSDS  
270 across a set of height-associated SNPs was significantly different from the null expectation, we  
271 performed 100,000 permutations of the sign of tSDS across these SNPs and reported the empirical *p*-  
272 value.



## 273 Results

### 274 European population structure underlying GWAS summary statistics

275 Incomplete control of population structure could lead to biases in the estimate of the effect sizes in  
276 GWAS, and as a result, polygenic scores constructed based on associated loci ascertained from these  
277 GWAS would show elevated population differentiation relative to neutral genetic drift (Robinson et al.,  
278 2015). For example, because the primary feature of genetic differentiation in mainland Europe is along  
279 the north-south axis, if human height is differentiated along this axis due to non-genetic effects, any  
280 variant that is also differentiated along this axis would have an overestimated effect size if the  
281 population structure is not well controlled in GWAS. Using GWAS summary statistics from a distant  
282 population should alleviate this issue, because the effect of stratification in the GWAS panel is  
283 independent from that of the testing populations for polygenic adaptation.

284 We first evaluated the impact of population stratification on height-associated variants ascertained from  
285 different GWAS panels that are available to us: the GIANT consortium, the UKB, and the BBJ datasets.  
286 Specifically, we examined the correlation between effect sizes estimated from each GWAS panel and the  
287 principal component loading on a PCA conducted in European populations (Supp Figure 1). We found  
288 that the effect sizes (beta) estimated in GIANT were highly correlated with the loading of the first two  
289 principal components of population structure ( $\rho = 0.137$ ,  $p = 2.49e-119$  for PC1;  $\rho = -0.018$ ,  $p =$   
290  $1.59e-4$  for PC2) (Figure 1). Compared to the situation in GIANT, the correlations in UKB were much  
291 smaller, although still significant ( $\rho = 0.017$ ,  $p = 3.27e-3$  for PC1;  $\rho = -0.011$ ,  $p = 7.08e-3$  for PC2). In  
292 BBJ, the correlations were negligible (Figure 1). The lower degree of correlation observed in UKB could in  
293 principle be driven by selection, or alternatively the effect sizes on height estimated from UKB were not  
294 completely free from stratification. On the other hand, effect sizes from BBJ were independent of any  
295 population structure in Europeans. Therefore, we will conservatively use height-associated SNPs  
296 ascertained from BBJ as the set of SNPs used in primary analysis, although we also characterized the  
297 impact by ascertaining SNPs in different ascertainment panels for comparisons.

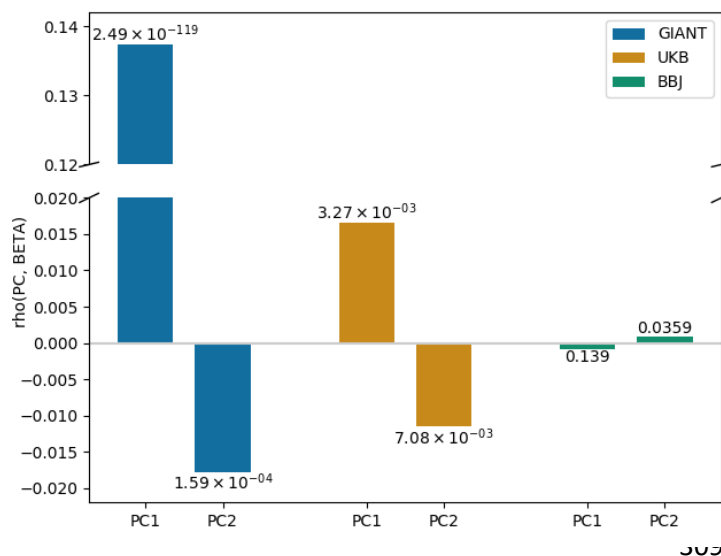

Figure 1. Evidence of stratification in GWAS summary statistics. Pearson Correlation coefficients of PC loadings and SNP effects from GIANT, UKB, and BBJ, across all SNPs. P values indicated on each bar are based on Jackknife standard errors (1000 blocks).

## 310 Signals of polygenic adaptation in Sardinians

311 To evaluate the signal of polygenic adaptation in Sardinians, we calculated the average polygenic scores  
312 for Sardinians and four mainland European populations (CEU, TSI, GBR, and IBS) based on height-  
313 associated loci surpassing the genome-wide significant threshold ( $P < 5e-8$ ) ascertained from GIANT,  
314 UKB, or BBJ. We then used Berg and Coop's Qx and conditional Z-score framework to evaluate the  
315 significance of differences in polygenic scores across populations. We found that across all GWAS panels  
316 the estimated polygenic height scores in Sardinians remain significantly lower than would be expected  
317 based on its genetic relatedness to European populations (Figure 2). However, the degree to which  
318 Sardinians were genetically shorter were more attenuated when using summary statistics derived from  
319 UKB and BBJ, relative to GIANT (Sardinians were 0.37, 0.35, and 0.94 units of s.d. shorter than CEU using  
320 polygenic scores computed from UKB, BBJ, and GIANT, respectively).

321 We focused on examining only variants surpassing genome-wide significance threshold to be better  
322 protected from uncorrected stratification, particularly when using summary statistics from European  
323 populations. But we also examined the effect of a different approach to identify height-associated  
324 variants used by previous reports (Berg et al., 2019; Sohail et al., 2019), namely by selecting the lowest  
325 p-value SNPs from approximately independent LD blocks across the genome. This resulted in  
326 approximately 1,700 variants using the GIANT or UKB GWAS panels, or 1,400 variants using the BBJ  
327 panel. By including more variants across the genome, most of which were not significantly associated  
328 with height, we observed that the polygenic height difference between Sardinians and the CEU  
329 population increased from 0.94 to 1.61, when using summary statistics from GIANT. More strikingly, the  
330 statistical evidence for adaptation became much stronger ( $P$  decreased from  $3.41e-11$  to  $6.66e-16$ , Supp  
331 Figure 2). This is also observed, although to a lesser extent, when using summary statistics from UKB  
332 (Supp Figure 2). In contrast, when using summary statistics from BBJ, this ascertainment scheme did not  
333 significantly exacerbate the difference in polygenic height scores between Sardinia and CEU, and  
334 actually decreased the statistical evidence of adaptation. In fact, ascertaining variants from BBJ  
335 summary statistics provided the strongest signal-to-noise ratio in the per-variant contribution of  
336 population differences (14.22 vs. 6.64 when using UKB; Table 1). When we stratified variants based on  
337 whether the variant surpassed the genome-wide significance threshold, we found the per-variant  
338 contributions of polygenic height score differences between CEU and Sardinians due to sub-threshold  
339 variants in the GIANT summary statistics ( $7.15e-4$  s.d. difference per allele) to be as large as that due to  
340 genome-wide significant variants in the UKB or BBJ summary statistics ( $4.22e-4$  and  $7.18e-4$  s.d.  
341 difference per allele), consistent with enrichment of uncontrolled stratification (Table 1). On the other  
342 hand, the contributions due to sub-threshold variants in BBJ summary statistics were an order of  
343 magnitude less than that of the genome-wide significant variants (Table 1). Taken together, these results  
344 suggest that the exaggerated signature of polygenic adaptation using GIANT was at least partly due to  
345 the practice of ascertain SNPs in approximate linkage equilibrium blocks, which enriched for loci that  
346 escaped statistical control of stratification. A better analytical practice would be to analyze a set of  
347 independent variants ranked by p-values such that true height-associated variants will be highly  
348 enriched. This also attested that summary statistics from BBJ is free from stratification in the test  
349 (European) populations, as sub-threshold SNPs added noise to the analysis.

350 The interpretation of the conditional Z-score results (Figure 2) implicitly assumes that all other  
351 populations tested in this framework are evolving neutrally. Our observation could also be explained if  
352 height-associated loci are evolving neutrally in Sardinia, but collectively increasing the genetic height in

353 all mainland European populations. To further investigate if selection is acting on height-associated loci  
354 in Sardinia, we compared the trajectory of polygenic height scores in Sardinia to that from the GBR  
355 population. Using the proportion-of-lineages estimator from Edge and Coop (Edge & Coop, 2019), the  
356 most powerful of the three estimators introduced in terms of detecting adaptation, we observed that  
357 the population-mean polygenic score for height has been decreasing in Sardinia, while it mainly stayed  
358 constant in GBR, in the past ~10 thousand years (ky) (Figure 3). We tested if whether the decreasing  
359 trend in Sardinia was significant relative to GBR for two time points: 20 ky and 10 ky before present, as  
360 these were approximately the time with first evidence of human inhabitation on Sardinia (Calò et al.,  
361 2008; Vona, 1997) and the Neolithic period and divergence between present day Sardinians and  
362 mainland Europeans (Chiang et al., 2018), respectively. We found that the mean polygenic height score  
363 in Sardinia was significantly decreasing from that in GBR since at least 10 kya ( $p = 0.0123$ ). The  
364 trend was not significant between 20 ky and 10 ky ago ( $p = 0.5307$ ). We also observed qualitatively  
365 similar trend of decrease in polygenic height score in Sardinia relative to GBR using the other two  
366 estimators presented in Edge and Coop (Supp Figure 3), however, these estimators are known to be  
367 much more variable and thus have much less power to detect selection (Edge & Coop, 2019). When  
368 using height-associated loci ascertained from UKB, we observed similar results (Supp Figure 4;  $p =$   
369 0.0321 and 0.5071 for differences between 10 kya to present and 20 kya to 10 kya, respectively).

370

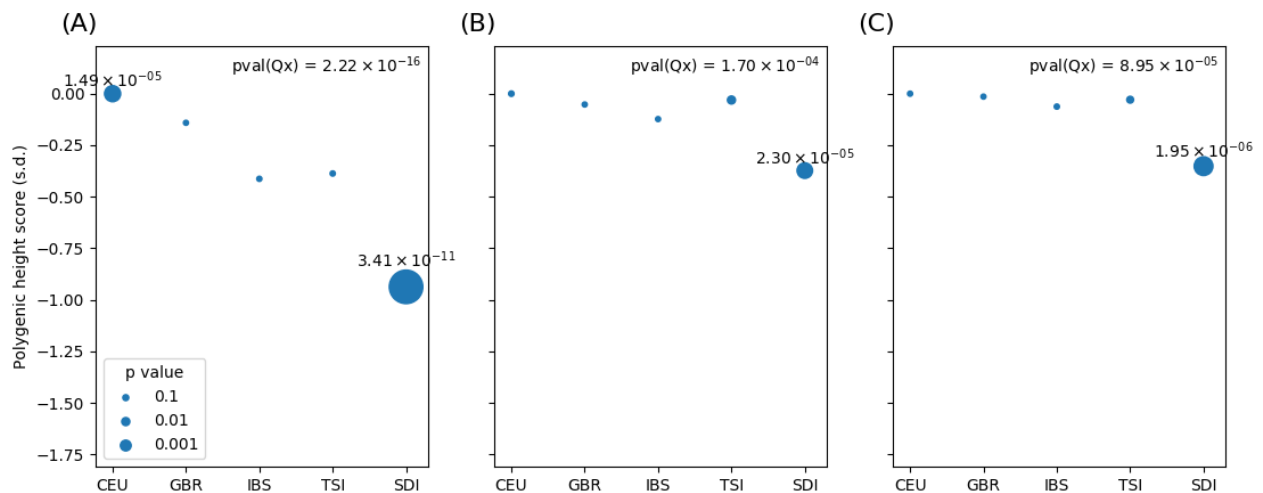

371

372 *Figure 2. Excess variance tests in Sardinia. The polygenic score was constructed based on SNPs from (A)*  
373 *GIANT, (B) UKB, and (C) BBJ ascertained by picking genome-wide significant SNPs that are more than 500*  
374 *kb apart from each other. The P values are represented by the size of each circle, and those lower than*  
375 *0.01 are shown in the plot. SDI, Sardinians; IBS: Iberian Population in Spain, TSI: Toscani in Italia, GBR:*  
376 *British in England and Scotland, and CEU: Utah Residents with Northern and Western European Ancestry,*  
377 *are from 1000 Genome Project.*

378

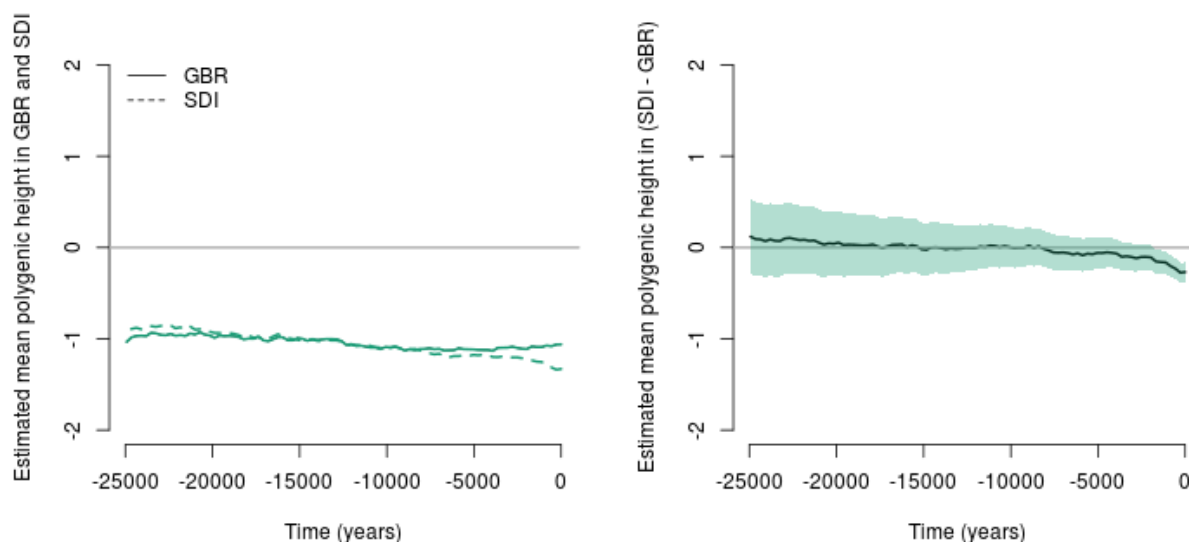

379  
 380 *Figure 3. The trajectory of mean polygenic height scores in British (GBR) and Sardinian (SDI) populations*  
 381 *over the past 25 ky. The past polygenic scores are estimated by the proportion-of-lineages estimators*  
 382 *from Edge and Coop, using height loci and effect sizes ascertained from BBJ. The left panel shows the*  
 383 *mean polygenic scores in the GBR and SDI using the proportion-of-lineages estimator. The right panel*  
 384 *shows the difference between GBR and SDI in the mean polygenic scores using the estimator. Shaded*  
 385 *areas denote the 95% confidence interval. The mean polygenic height score in Sardinia was significantly*  
 386 *decreasing from that in GBR since at least 10 kya ( $p = 0.0123$ ), while not significant between 20 kya and*  
 387 *10 kya ( $p = 0.5307$ ).*

388

389 *Table 1. Per-variant polygenic height score differences between CEU and Sardinians*

|       | Independent LD block (# variants) | Genome-wide significant variants | Nonsignificant variants | Ratio between significant and nonsignificant variants |
|-------|-----------------------------------|----------------------------------|-------------------------|-------------------------------------------------------|
| GIANT | 9.46e-04 (1702)                   | 1.54e-03 (476)                   | 7.15e-04 (1226)         | 2.15                                                  |
| UKB   | 2.34e-04 (1703)                   | 4.22e-04 (812)                   | 6.36e-05 (891)          | 6.64                                                  |
| BBJ   | 2.26e-04 (1444)                   | 7.18e-04 (379)                   | 5.05e-05 (1065)         | 14.22                                                 |

390

391

### 392 [Signals of polygenic adaptation in mainland Europeans](#)

393 We then focused on evaluating whether there is a signal of polygenic adaptation in mainland Europeans,  
 394 the population originally indicated (Berg & Coop, 2014; Field et al., 2016; Robinson et al., 2015; Turchin  
 395 et al., 2012) but recently challenged (Berg et al., 2019; Sohail et al., 2019). Consistent with the recent  
 396 reports, using Berg and Coop's  $Q_x$  and conditional Z-score, we observed clear signal of adaptation when  
 397 ascertaining based on summary statistics from GIANT, but not UKB or BBJ (Supp Figure 5).

398 Any signal of adaptation in the mainland Europe, if it exists, is undoubtedly weaker than that in Sardinia.  
399 Therefore, we further assessed if the lack of signal in the analysis based on variants ascertained from BBJ  
400 could be due to loss of power in the  $Q_x$  and conditional Z-score. We explored two potential causes. First,  
401 we examined the frequency distribution of BBJ height variants in mainland Europeans. We found that  
402 there is a shift towards rarer alleles in BBJ. The mean MAF in Europe is 0.227 and 0.258 for BBJ-  
403 ascertained and UKB-ascertained variants, respectively (Supp Figure 6). Although the majority of BBJ-  
404 ascertained variants had relatively high frequency in European (~350 SNPs, or 74.32% of all BBJ-  
405 ascertained variants, with  $MAF > 0.1$ ), the rarer variants also tend to be less associated with height in  
406 UKB (Supp Figure 7). For example, of the 108 variants with  $MAF < 0.1$  in UKB, 47.22% of them are not  
407 associated with height ( $p$ -value  $> 0.05$ ), suggesting possibly that differences in LD between UKB and BBJ  
408 dissociated the causal SNP from the proxy we selected, or that the effect on height is specific to BBJ.  
409 However, despite the additional noises from potentially selecting the “wrong” variants for analysis, re-  
410 running  $Q_x$  test (Berg & Coop, 2014) restricting to BBJ variants with  $MAF > 0.1$  in mainland Europeans or  
411 with  $P$ -value  $< 5e-8$  in UKB did not qualitatively change the results (Supp Figure 8).

412 Secondly, the Conditional Z-test relies on testing a particular population while conditioning on  
413 relationship to all other populations in the dataset, assuming all other populations are neutrally evolving.  
414 If, for example, a very closely related population (e.g., GBR to CEU) is included in the reference  
415 population and assumed to be evolving neutrally, this could decrease the power to detect adaptation  
416 using this framework. Therefore, we conducted a simple t-test of frequency difference of height-  
417 increasing alleles (Turchin et al., 2012) at genome-wide significant variants between Northern  
418 Europeans (grouping CEU and GBR) and Southern European (grouping IBS and TSI). Using height-  
419 associated loci ascertained from GIANT, we observe clear difference in frequency between the Northern  
420 and Southern Europeans (height-increasing alleles are on average 1.12% higher in Northern Europeans,  
421  $p = 5.24e-8$ ). On the other hand, using height-associated loci ascertained from either UKB or BBJ, we  
422 found much more attenuated signals that are not significant (0.011% and 0.20%,  $p = 0.931$  and 0.313 in  
423 UKB and BBJ, respectively), even if we applied more permissive  $p$ -value thresholds on both populations  
424 (Supp Table 1).

425 Because the sample sizes in mainland European populations from 1000 Genomes are relatively small ( $N$   
426 = 190 for Northern Europeans, 214 for Southern Europeans), the estimate of allele frequency may suffer  
427 from sampling errors that could mask the allele frequency difference between populations. We found it  
428 difficult to obtain precise estimates of allele frequency ideally based on thousands of individuals,  
429 particularly for Southern Europeans on the mainland. To partly overcome this challenge, we  
430 downloaded variant frequency data from 125,748 exomes from gnomAD v2.1 (Genome Aggregation  
431 Database) (Karczewski et al., 2019), which contained 21,111 samples categorized as North-Western  
432 Europeans (NWE), and 5,752 samples categorized as Southern Europeans (SEU). We restricted our  
433 analysis to only independent exome variants which have frequency estimated from more than 10,000  
434 alleles in both SEU and NEW and tested in the GWAS panel. We found no significant differences in  
435 frequency again after adjusting for the number of tests performed (Supp Table 2). However, note that  
436 the lack of signal could be at least partly attributed to the relatively low LD between the tagging exomic  
437 variants and the nearby top variants in the GWAS summary statistics (Supp Figure 9), as well as the  
438 constraints due to purifying selection that the exonic variants are expected to also experience.

439 While the allele frequency-based approaches deployed so far would be subjected to a loss of power due  
440 to incompleteness in the frequency estimates on the exact variants in large cohorts, haplotype-based

441 analysis may be more sensitive for detecting adaptation. We thus evaluated the signal of polygenic  
442 adaptation in 3,195 individuals from UK10K dataset using the Singleton Density Score polarized to the  
443 height-increasing allele (tSDS), which should be most powered to detect changes over the last 2,000-  
444 3,000 years (Field et al., 2016). Focusing on independent variants surpassing genome-wide significance  
445 in either UKB or BBJ, we found that tSDS for height-increasing alleles are significantly elevated ( $p = 1e-5$   
446 and  $4.8e-4$  when ascertaining from UKB and BBJ, respectively; Figure 4). This suggests that the height-  
447 increasing alleles, compared to the height-decreasing alleles at the same genomic site, is more likely to  
448 be found on the longer haplotype, consistent with positive selection in the recent past. The result using  
449 height-associated variants ascertained from BBJ is particularly encouraging, as the patterns of variation  
450 at these loci appear unaffected by the major axis of stratification and height differentiation within  
451 Europe (Figure 1). While our conclusion is limited to the British population for which large-scale  
452 genome-wide sequencing data is available, taken together our results do imply that outside of the  
453 Sardinian population, height differences in at least some populations in mainland Europe may be driven  
454 by polygenic selection. Future sequencing data or more precise genome-wide frequency estimates may  
455 further characterize this observation.

456

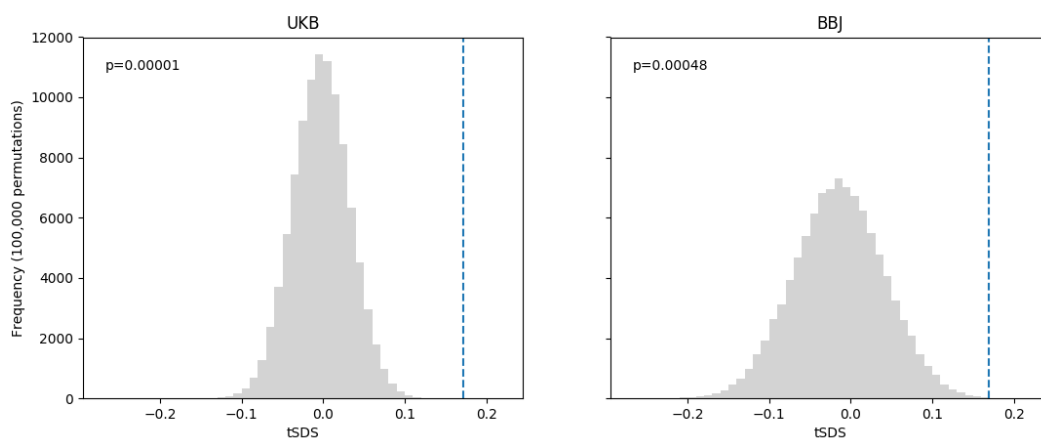

457

458 *Figure 4. The average of tSDS in height-associated SNPs in UKB and BBJ. The histogram is the null*  
459 *distribution of average tSDS from 100,000 permutations. The dashed line indicates the observed average*  
460 *of tSDS.*

461



## 462 Discussion

463 Using a set of height-associated alleles ascertained from a GWAS panel that is not impacted by  
464 population structure in Europe (Figure 1), we have demonstrated in this study that height alleles appear  
465 to be under selection in some European populations. Our observation among the Sardinians is  
466 qualitatively consistent with previous report in this population (Zoledziwska et al., 2015), although the  
467 signal is more attenuated (Figure 2). Moreover, using the recently developed method to infer trajectory  
468 of polygenic height scores, we showed that the strongest feature in our analysis is driven by a decrease  
469 in polygenic height scores in the Sardinians. In mainland Europe, we could not detect a signature of  
470 polygenic adaptation using frequency-based methods (Supp Figures 5 and 8; Supp Tables 1 and 2),  
471 consistent with previous suggestions (Berg et al., 2019; Sohail et al., 2019) that selection signals, if any,  
472 would be much more attenuated. However, we did find a robust signal of recent selection for height-  
473 increasing alleles in an independent British population using tSDS (Figure 4).

474 A major consideration in detecting signals of polygenic selection is to examine the causal SNPs for the  
475 trait of interest. As we found in Table 1, variants that escaped state-of-the-art statistical controls for  
476 stratification in GWAS could be enriched among those ascertained from approximately independent LD  
477 blocks. Focusing only on genome-wide significant variants can help alleviate the concerns of population  
478 stratification. (Although the effect sizes may still reflect some residual stratification in a polygenic score  
479 style of analysis.) On the other hand, trait-associated variants found in GWAS using genotyping data are  
480 only proxies for causal variation. Differences in LD across population could thus lead to a decrease in the  
481 accuracy of polygenic score prediction and the lowered power in detecting polygenic selection. Fine-  
482 mapping could help identify the causal or the best tagging variants at associated loci. We elected not to  
483 conduct a fine-mapping analysis because currently the largest GWAS datasets are in Europeans and East  
484 Asians; fine-mapping approaches using Europeans may cause residual stratification to seep into the  
485 ascertainment scheme. As larger non-European GWAS datasets become available, fine-mapping studies  
486 outside of Europe may provide better set of causal alleles associated with height to address the question  
487 of adaptation in Europe.

488 A second consideration is that the lack of signals in mainland Europeans using direct comparison of  
489 allele frequencies might be partly due to the small sample sizes in publicly available, geographically  
490 indexed, whole genome sequences. Because only a subtle allele frequency shift would be expected in  
491 mainland Europe, the imprecision in allele frequency estimates can mask the signal of adaptation (subtle  
492 coordinated allele frequency shifts between populations). We note that Berg and Coop's framework of  
493 excess variance test and conditional Z-scores (Berg & Coop, 2014) could also possibly be impacted by  
494 this issue with precision of allele frequency estimates.

495 Concerns of both the imprecise ascertainment of causal allele and of allele frequency estimates could be  
496 partly overcome by large-scale haplotype-based methods. Using height-associated loci ascertained from  
497 BBJ, where stratification should no longer be an issue, we observed a robust signal of recent selection  
498 for height-increasing alleles using tSDS, which was calculated on a sample size of > 3,000 UK individuals  
499 (Field et al., 2016) (Figure 4). In contrast, our polygenic score trajectory analysis did not show any recent  
500 increase in the 91 GBR individuals (Figure 3). This analysis is a hybrid approach based on an inferred  
501 ancestral recombination graph that combines both haplotype and genotype information, so the same  
502 shortcomings in frequency-based approach could partly explain the null finding. Moreover,  
503 computationally this approach is currently limited to smaller sample sizes, which may also limit our



504 resolution in the recent past. Therefore, future scalable inference on genome-wide genealogies from an  
505 independent Northern European population may help address this discrepancy.

506 The signal of natural selection favoring shorter stature in the Sardinians is very strong, regardless of  
507 whether we used loci ascertained from UKB or BBJ. The trajectory of polygenic height scores in the  
508 Sardinians decreased significantly from that in GBR during the past 10,000 years further supported this  
509 conclusion. Taking into account recent evidence of selection for shorter stature in the island of Flores,  
510 these observations might suggest a general impact due to the island effect, akin to what has been  
511 observed in some island mammals, who became adaptively smaller relative to their mainland  
512 counterparts (Millien, 2006; model 1 in Figure 5). However, as the power of polygenic score trajectory to  
513 detect between-population differences decreases going further back in time (Edge & Coop, 2019), we  
514 note that we cannot definitively infer that adaptation towards shorter height occurred on the Sardinia  
515 island starting around 10,000 years ago. It is possible that adaptation occurred in the ancestors of  
516 modern Sardinians, long before the Sardinia island was populated. Because of the relative isolation since  
517 the founding of Sardinia (Chiang et al., 2018), the Sardinian population exhibit the strongest effect  
518 among European populations today (model 2 in Figure 5). This may be consistent with the recent  
519 observation that Neolithic European populations are shorter than both their predecessors and their  
520 successors in Europe in both genetic and skeletal stature (Cox, Ruff, Maier, & Mathieson, 2019);  
521 Sardinians retained the largest amount of Neolithic ancestry among a number of extant European  
522 populations tested (Chiang et al., 2018; Haak et al., 2015). Furthermore, the two models are not  
523 mutually exclusive, and may be acting along with non-additive components of height variation (Joshi et  
524 al., 2015; Zoledziowska et al., 2015) to lead to the large difference in height observed between  
525 Sardinians and mainland Europeans. When considering Europe at large, our tSDS findings in the British  
526 population may be consistent with previous suggestions that the post-Neolithic Eurasian steppe  
527 populations may have been selected for increased height (Martiniano et al., 2017), and that admixture  
528 of these populations, in different proportions in mainland Europe, provided the tSDS signal and  
529 contributed to the pattern of height variation across Europe. If such an event occurred, it seems that it  
530 would have been independent of a selection for shorter height in Sardinians or their ancestors, since we  
531 observed a monotonic decreasing trend in polygenic height in Sardinians. Further explorations to  
532 differentiate these two models will likely rely on examining a large number of ancient specimen from  
533 Sardinia (Marcus et al., 2019), as well as studying other isolated island populations across the world.

534 Taken together, while the timing and geographical location of selection for height (or alternatively, for a  
535 set of traits correlated with height) remain elusive, it seems evident that human height differences in  
536 Europe had been driven by selection in at least some instances. Multiple episodes of adaptation may  
537 have occurred and influenced the height of past populations. Signatures of these adaptive events may  
538 have stemmed from outside of Sardinia but today they are much more obscured, or even changed  
539 direction, due to recent population migrations and admixture. Furthermore, while much of the literature  
540 characterizing polygenic scores stemming from GWAS summary statistics have focused on its poor  
541 transferability between populations (Martin et al., 2019), our results here demonstrate that such a  
542 polygenic score estimator is also unbiased and can greatly help addressing important population genetic  
543 questions.

544

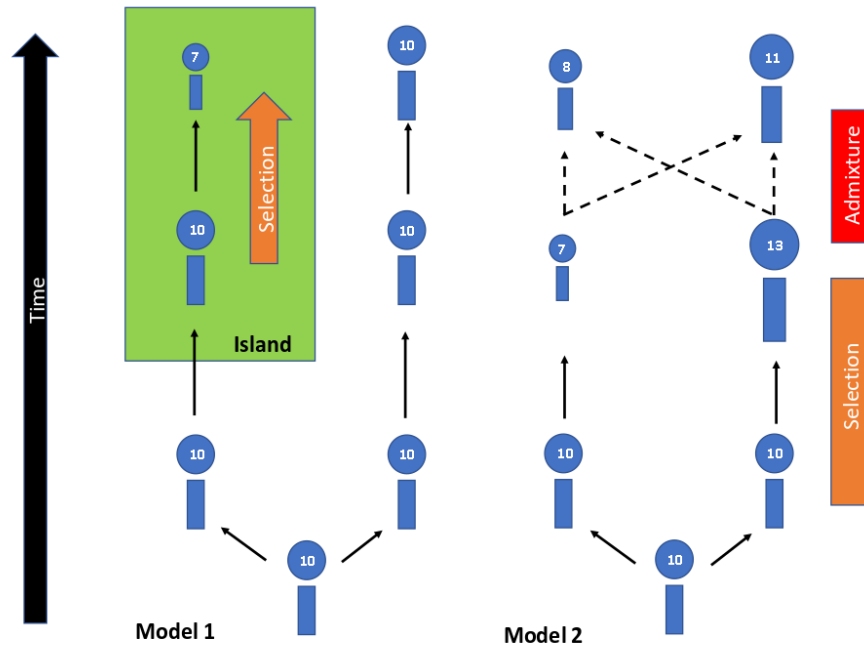

545

546 *Figure 5. Possible evolutionary models for human height. Each figure represents a modern or ancestral*  
547 *population, with a pseudo score for height labeled in the circle. Model 1 (left) illustrates the island effect,*  
548 *in which an island population, possibly like the one in Sardinia, were selected for shorter stature upon*  
549 *arriving at the island. The non-island population were assumed to be not under selection. Model 2 (right)*  
550 *illustrates an alternative model, in which selection occurred much more anciently such that*  
551 *differentiation between populations has occurred. It is unclear the direction of selection in this scenario,*  
552 *and may be in opposite directions in different populations due to differential interaction with the*  
553 *geography or environment. At this point, height no longer needs to be selected anymore, but subsequent*  
554 *migration between populations establishes the pattern of height variability. In both cases, adaptation*  
555 *has occurred and can be detected by the framework utilized in this paper, although we cannot infer the*  
556 *timing and the location of selection. Also note that instead of height, a trait or collection of traits proxied*  
557 *by height could be under selection, although we focused on height in this model.*

558

## 559 Supplemental Data

560 Supplemental Data include 9 figures and 2 tables.

561

## 562 Declaration of Interests

563 The authors declare no competing interests.

564

## 565 Acknowledgments

566 We gratefully thank Graham Coop, Michael D. Edge, and Michael C. Turchin for helpful comments and  
567 discussions. This work is supported by Start-up funds provided by the Center for Genetic Epidemiology  
568 at Keck School of Medicine USC (to C.W.K.C.).

569

## 570 Web Resources

571 GIANT summary association statistics,

572 [https://portals.broadinstitute.org/collaboration/giant/images/0/01/GIANT\\_HEIGHT\\_Wood\\_et\\_al\\_2014\\_publicrelease\\_HapMapCeuFreq.txt.gz](https://portals.broadinstitute.org/collaboration/giant/images/0/01/GIANT_HEIGHT_Wood_et_al_2014_publicrelease_HapMapCeuFreq.txt.gz)

574 UKB summary association statistics, [https://storage.googleapis.com/ukbb-robert/height\\_ukb\\_giant/robert1/50.imputed\\_v3.results.both\\_sexes.tsv.gz](https://storage.googleapis.com/ukbb-robert/height_ukb_giant/robert1/50.imputed_v3.results.both_sexes.tsv.gz)

576 Genetic maps generated from the 1000 Genome phased OMNI data,  
577 [http://ftp.1000genomes.ebi.ac.uk/vol1/ftp/technical/working/20130507\\_omni\\_recombination\\_rates/](http://ftp.1000genomes.ebi.ac.uk/vol1/ftp/technical/working/20130507_omni_recombination_rates/)

578 Human ancestral genome,  
579 [ftp://ftp.1000genomes.ebi.ac.uk/vol1/ftp/phase1/analysis\\_results/supporting/ancestral\\_alignments/](ftp://ftp.1000genomes.ebi.ac.uk/vol1/ftp/phase1/analysis_results/supporting/ancestral_alignments/)

580 Genomic mask file,  
581 [ftp://ftp.1000genomes.ebi.ac.uk/vol1/ftp/release/20130502/supporting/accessible\\_genome\\_masks/](ftp://ftp.1000genomes.ebi.ac.uk/vol1/ftp/release/20130502/supporting/accessible_genome_masks/)

582 SDS from UK10K, <http://web.stanford.edu/group/pritchardlab/UK10K-SDS-values.zip>

583 PLINK version 1.9, [www.cog-genomics.org/plink/1.9/](http://www.cog-genomics.org/plink/1.9/)

584 Eigensoft version 7.2.1, <https://github.com/DReichLab/EIG/archive/v7.2.1.tar.gz>

585 Eagle version 2.4.1, <https://data.broadinstitute.org/alkesgroup/Eagle/>

586 RELATE version 1.0.8, <https://myersgroup.github.io/relate/>

587 Code for Qx test, <https://github.com/jjberg2/PolygenicAdaptationCode>

588 Code for polygenic score trajectory, [https://github.com/mdedge/rhps\\_coalescent](https://github.com/mdedge/rhps_coalescent)

589

## 590 Reference

- 591 1000 Genomes Project Consortium, Auton, A., Brooks, L. D., Durbin, R. M., Garrison, E. P., Kang, H. M., ...  
592 Abecasis, G. R. (2015). A global reference for human genetic variation. *Nature*, *526*(7571), 68–74.  
593 <https://doi.org/10.1038/nature15393>
- 594 Akiyama, M., Ishigaki, K., Sakate, S., Momozawa, Y., Horikoshi, M., Hirata, M., & Kamatani, Y. (n.d.).  
595 Characterizing rare and low-frequency height-associated variants in the Japanese population.  
596 *Nature Communications*.
- 597 Bentham, J., Di Cesare, M., Stevens, G. A., Zhou, B., Bixby, H., Cowan, M., ... Cisneros, J. Z. (2016). A  
598 century of trends in adult human height. *ELife*, *5*(2016JULY).  
599 <https://doi.org/10.7554/eLife.13410.001>
- 600 Berg, J. J., & Coop, G. (2014). A Population Genetic Signal of Polygenic Adaptation. *PLoS Genetics*, *10*(8),  
601 e1004412. <https://doi.org/10.1371/journal.pgen.1004412>
- 602 Berg, J. J., Harpak, A., Sinnott-Armstrong, N., Joergensen, A. M., Mostafavi, H., Field, Y., ... Coop, G.  
603 (2019). Reduced signal for polygenic adaptation of height in UK Biobank. *ELife*, *8*.  
604 <https://doi.org/10.7554/eLife.39725>
- 605 Berisa, T., & Pickrell, J. K. (2016). Approximately independent linkage disequilibrium blocks in human  
606 populations. *Bioinformatics (Oxford, England)*, *32*(2), 283–285.  
607 <https://doi.org/10.1093/bioinformatics/btv546>
- 608 Calò, C., Melis, A., Vona, G., & Piras, I. (2008). Review Synthetic Article: Sardinian Population (Italy): a  
609 Genetic Review. *International Journal of Modern Anthropology*, *1*(1), 39–64.  
610 <https://doi.org/10.4314/ijma.v1i1.60356>
- 611 Chang, C. C., Chow, C. C., Tellier, L. C., Vattikuti, S., Purcell, S. M., & Lee, J. J. (2015). Second-generation  
612 PLINK: rising to the challenge of larger and richer datasets. *GigaScience*, *4*(1), 7.  
613 <https://doi.org/10.1186/s13742-015-0047-8>
- 614 Chiang, C. W. K., Marcus, J. H., Sidore, C., Biddanda, A., Al-Asadi, H., Zoledziewska, M., ... Novembre, J.  
615 (2018). Genomic history of the Sardinian population. *Nature Genetics*, *50*(10), 1426–1434.  
616 <https://doi.org/10.1038/s41588-018-0215-8>
- 617 Cox, S. L., Ruff, C. B., Maier, R. M., & Mathieson, I. (2019). Genetic contributions to variation in human  
618 stature in prehistoric Europe. *BioRxiv*, 690545. <https://doi.org/10.1101/690545>
- 619 Edge, M. D., & Coop, G. (2019). Reconstructing the History of Polygenic Scores Using Coalescent Trees.  
620 *Genetics*, *211*(1), 235–262. <https://doi.org/10.1534/genetics.118.301687>
- 621 Field, Y., Boyle, E. A., Telis, N., Gao, Z., Gaulton, K. J., Golan, D., ... Pritchard, J. K. (2016). Detection of  
622 human adaptation during the past 2000 years. *Science*, *354*(6313), 760–764.  
623 <https://doi.org/10.1126/SCIENCE.AAG0776>
- 624 Grasgruber, P., Cacek, J., Kalina, T., & Sebera, M. (2014). The role of nutrition and genetics as key  
625 determinants of the positive height trend. *Economics & Human Biology*, *15*, 81–100.  
626 <https://doi.org/10.1016/J.EHB.2014.07.002>
- 627 Guo, J., Wu, Y., Zhu, Z., Zheng, Z., Trzaskowski, M., Zeng, J., ... Yang, J. (2018). Global genetic  
628 differentiation of complex traits shaped by natural selection in humans. *Nature Communications*,  
629 *9*(1), 1865. <https://doi.org/10.1038/s41467-018-04191-y>

- 630 Haak, W., Lazaridis, I., Patterson, N., Rohland, N., Mallick, S., Llamas, B., ... Reich, D. (2015). Massive  
631 migration from the steppe was a source for Indo-European languages in Europe. *Nature*, 522(7555),  
632 207–211. <https://doi.org/10.1038/nature14317>
- 633 Haworth, S., Mitchell, R., Corbin, L., Wade, K. H., Dudding, T., Budu-Aggrey, A., ... Timpson, N. J. (2019).  
634 Apparent latent structure within the UK Biobank sample has implications for epidemiological  
635 analysis. *Nature Communications* 2019 10:1, 10(1), 333. [https://doi.org/10.1038/s41467-018-](https://doi.org/10.1038/s41467-018-08219-1)  
636 08219-1
- 637 Hirata, M., Kamatani, Y., Nagai, A., Kiyohara, Y., Ninomiya, T., Tamakoshi, A., ... Yoshiyama, T. (2017).  
638 Cross-sectional analysis of BioBank Japan clinical data: A large cohort of 200,000 patients with 47  
639 common diseases. *Journal of Epidemiology*, 27(3), S9–S21.  
640 <https://doi.org/10.1016/j.je.2016.12.003>
- 641 Joshi, P. K., Esko, T., Mattsson, H., Eklund, N., Gandin, I., Nutile, T., ... Wilson, J. F. (2015). Directional  
642 dominance on stature and cognition in diverse human populations. *Nature*, 523(7561), 459–462.  
643 <https://doi.org/10.1038/nature14618>
- 644 Karczewski, K. J., Francioli, L. C., Tiao, G., Cummings, B. B., Alföldi, J., Wang, Q., ... MacArthur, D. G.  
645 (2019). Variation across 141,456 human exomes and genomes reveals the spectrum of loss-of-  
646 function intolerance across human protein-coding genes. *BioRxiv*, 531210.  
647 <https://doi.org/10.1101/531210>
- 648 Kerminen, S., Martin, A. R., Koskela, J., Ruotsalainen, S. E., Havulinna, A. S., Surakka, I., ... Pirinen, M.  
649 (2019). Geographic Variation and Bias in the Polygenic Scores of Complex Diseases and Traits in  
650 Finland. *The American Journal of Human Genetics*, 104(6), 1169–1181.  
651 <https://doi.org/10.1016/j.ajhg.2019.05.001>
- 652 Liu, X., Loh, P.-R., O'Connor, L. J., Gazal, S., Schoech, A., Maier, R. M., ... Price, A. L. (2018). Quantification  
653 of genetic components of population differentiation in UK Biobank traits reveals signals of  
654 polygenic selection. *BioRxiv*, 357483. <https://doi.org/10.1101/357483>
- 655 Locke, A. E., Steinberg, K. M., Chiang, C. W. K., Service, S. K., Havulinna, A. S., Stell, L., ... Freimer, N. B.  
656 (2019). Exome sequencing of Finnish isolates enhances rare-variant association power. *Nature*, 1–6.  
657 <https://doi.org/10.1038/s41586-019-1457-z>
- 658 Loh, P.-R., Tucker, G., Bulik-Sullivan, B. K., Vilhjálmsson, B. J., Finucane, H. K., Salem, R. M., ... Price, A. L.  
659 (2015). Efficient Bayesian mixed-model analysis increases association power in large cohorts.  
660 *Nature Genetics*, 47(3), 284–290. <https://doi.org/10.1038/ng.3190>
- 661 Loh, P. R., Danecek, P., Palamara, P. F., Fuchsberger, C., Reshef, Y. A., Finucane, H. K., ... Price, A. L.  
662 (2016). Reference-based phasing using the Haplotype Reference Consortium panel. *Nature*  
663 *Genetics*, 48(11), 1443–1448. <https://doi.org/10.1038/ng.3679>
- 664 Marcus, J. H., Posth, C., Ringbauer, H., Lai, L., Skeates, R., Sidore, C., ... Novembre, J. (2019). Population  
665 history from the Neolithic to present on the Mediterranean island of Sardinia: An ancient DNA  
666 perspective. *BioRxiv*, 583104. <https://doi.org/10.1101/583104>
- 667 Martin, A. R., Kanai, M., Kamatani, Y., Okada, Y., Neale, B. M., & Daly, M. J. (2019). Clinical use of current  
668 polygenic risk scores may exacerbate health disparities. *Nature Genetics*, 51(4), 584–591.  
669 <https://doi.org/10.1038/s41588-019-0379-x>
- 670 Martiniano, R., Cassidy, L. M., O'Maolduin, R., McLaughlin, R., Silva, N. M., Manco, L., ... Bradley, D. G.

- 671 (2017). The population genomics of archaeological transition in west Iberia: Investigation of  
672 ancient substructure using imputation and haplotype-based methods. *PLoS Genet*, *13*(7), e1006852.  
673 <https://doi.org/10.1371/journal.pgen.1006852>
- 674 McVicker, G., Gordon, D., Davis, C., & Green, P. (2009). Widespread Genomic Signatures of Natural  
675 Selection in Hominid Evolution. *PLoS Genetics*, *5*(5), e1000471.  
676 <https://doi.org/10.1371/journal.pgen.1000471>
- 677 Millien, V. (2006). Morphological Evolution Is Accelerated among Island Mammals. *PLoS Biology*, *4*(10),  
678 e321. <https://doi.org/10.1371/journal.pbio.0040321>
- 679 Nagai, A., Hirata, M., Kamatani, Y., Muto, K., Matsuda, K., Kiyohara, Y., ... Kubo, M. (2017). Overview of  
680 the BioBank Japan Project: Study design and profile. <https://doi.org/10.1016/j.je.2016.12.005>
- 681 Price, A. L., Weale, M. E., Patterson, N., Myers, S. R., Need, A. C., Shianna, K. V., ... Reich, D. (2008). Long-  
682 Range LD Can Confound Genome Scans in Admixed Populations. *American Journal of Human*  
683 *Genetics*. <https://doi.org/10.1016/j.ajhg.2008.06.005>
- 684 Robinson, M. R., Hemani, G., Medina-Gomez, C., Mezzavilla, M., Esko, T., Shakhbazov, K., ... Visscher, P.  
685 M. (2015). Population genetic differentiation of height and body mass index across Europe. *Nature*  
686 *GeNetics VOLUME*, *47*, 34. <https://doi.org/10.1038/ng.3401>
- 687 Sohail, M., Maier, R. M., Ganna, A., Bloemendal, A., Martin, A. R., Turchin, M. C., ... Sunyaev, S. R. (2019).  
688 Polygenic adaptation on height is overestimated due to uncorrected stratification in genome-wide  
689 association studies. *ELife*, *8*. <https://doi.org/10.7554/eLife.39702>
- 690 Speidel, L., Forest, M., Shi, S., & Myers, S. R. (2019). A method for genome-wide genealogy estimation  
691 for thousands of samples. *Nature Genetics*, *51*(9), 1321–1329. [https://doi.org/10.1038/s41588-](https://doi.org/10.1038/s41588-019-0484-x)  
692 [019-0484-x](https://doi.org/10.1038/s41588-019-0484-x)
- 693 Tucci, S., Vohr, S. H., McCoy, R. C., Vernot, B., Robinson, M. R., Barbieri, C., ... Green, R. E. (2018).  
694 Evolutionary history and adaptation of a human pygmy population of Flores Island, Indonesia.  
695 *Science (New York, N.Y.)*, *361*(6401), 511–516. <https://doi.org/10.1126/science.aar8486>
- 696 Turchin, M. C., Chiang, C. W., Palmer, C. D., Sankararaman, S., Reich, D., & Hirschhorn, J. N. (2012).  
697 Evidence of widespread selection on standing variation in Europe at height-associated SNPs.  
698 *Nature Genetics*, *44*(9), 1015–1019. <https://doi.org/10.1038/ng.2368>
- 699 Vona, G. (1997). The peopling of Sardinia (Italy): history and effects. *International Journal of*  
700 *Anthropology*, *12*(1), 71–87. <https://doi.org/10.1007/BF02447890>
- 701 Wood, A. R., Esko, T., Yang, J., Vedantam, S., Pers, T. H., Gustafsson, S., ... Frayling, T. M. (2014). Defining  
702 the role of common variation in the genomic and biological architecture of adult human height.  
703 *Nature Genetics*, *46*(11), 1173–1186. <https://doi.org/10.1038/ng.3097>
- 704 Zoledziewska, M., Sidore, C., Chiang, C. W. K., Sanna, S., Mulas, A., Steri, M., ... Cucca, F. (2015). Height-  
705 reducing variants and selection for short stature in Sardinia. *Nature Genetics*, *47*(11), 1352–1356.  
706 <https://doi.org/10.1038/ng.3403>
- 707
